# Supplementary material for: Recombinant protein secretion by Bacillus subtilis and Lactococcus lactis: pathways, applications, and innovation potential
Source: Oxford University Press journal article supplement (doi:10.1042/ebc20200171), 2021-05-07
Supplement: ebc-2020-0171c_supp.pdf [file ebc-2020-0171c_supp.pdf]

**Supplementary Table 1: Protein production and secretion in *B. subtilis* protease-deficient strains**

| <b>Product (origin) / Naturally secreted via Sec (Y/N*)<sup>1,2</sup></b>                                                                                                   | <b>Producing vector/Promoter/SP<sup>1</sup></b> | <b>Strain</b> | <b>Secreted yield</b>                                                                                                                                               | <b>Biological active/ Degradation*</b> | <b>Ref.**</b> |
|-----------------------------------------------------------------------------------------------------------------------------------------------------------------------------|-------------------------------------------------|---------------|---------------------------------------------------------------------------------------------------------------------------------------------------------------------|----------------------------------------|---------------|
| L-asparaginase (ASN) ( <i>B. subtilis</i> ) / Y (original SP mentioned <sup>2</sup> )                                                                                       | pP43NMK/P43 variant (B2, -28:A→G, 13:A→G)/WapA  | WB600         | After deletion of the N-terminal 25-residues of ASN 407.6 U/mL (2.5 g/L)                                                                                            | Y/N                                    | [1]           |
| Pullulanase ( <i>Bacillus naganoensis</i> ) / N                                                                                                                             | pMA0911/ <i>Phpall</i> or P43/ <i>LipA</i>      | WB600, WB800  | Best yield obtained using WB600 in combination with <i>SP-lipA</i> and P43 (24.5 ± 0.3 U/ml, 6.28x better than original (WB800 <i>SP-lipA</i> and <i>P-hpall</i> )) | Y/n.d.                                 | [2]           |
| Recombinant alkaline α-amylase (Unknown origin) / Y (mentioned in text <sup>2</sup> )                                                                                       | pMA0911- <i>amy/Phpall</i> /n.d.                | WB600 mut-12# | Yield increased with 35.0% and productivity with 8.8%, the extracellular protein concentration increased 37.9% when compared to WB600                               | Y/N                                    | [3]           |
| CotA-laccase ( <i>Bacillus pumilus</i> ) / N                                                                                                                                | pMA0911/ <i>Phpall</i> /WapA                    | WB600         | 373.1 U/mL                                                                                                                                                          | Y/n.d.                                 | [4]           |
| γ-Polyglutamic acid synthetase ( <i>B. subtilis</i> ) / N                                                                                                                   | pWB980/P43/n.d.                                 | WB600         | 1.74 g/L                                                                                                                                                            | n.d./N                                 | [5]           |
| Cellobiohydrolases ( <i>cbhA</i> , <i>celK</i> , <i>celO</i> , <i>cel48Y</i> , <i>cel48S</i> ) and endoglucanase ( <i>celA</i> ) ( <i>Clostridium thermocellum</i> ) / n.d. | pP43JM2/P43/NprB                                | WB600, WB800  | Efficient secretion for all but <i>CelO</i> . No quantification                                                                                                     | Y/I                                    | [6]           |
| Keratinase ( <i>Bacillus licheniformis</i> ) / Y (JQ894491 <sup>2</sup> )                                                                                                   | pMA0911/ <i>Phpall</i> /native                  | WB600         | 323 units/mL (non-induced)                                                                                                                                          | Y/N                                    | [7]           |
| Xylanase ( <i>Thermoanaerobacterium sp</i> ) / Y (mentioned in text <sup>2</sup> )                                                                                          | pJX33/ <i>Pbj31</i> /native                     | WB800         | (8.4U/ml)                                                                                                                                                           | Y/Y                                    | [8]           |

|                                                                                                       |                                                      |                                               |                                                                                                       |                                                           |          |
|-------------------------------------------------------------------------------------------------------|------------------------------------------------------|-----------------------------------------------|-------------------------------------------------------------------------------------------------------|-----------------------------------------------------------|----------|
| Bacillopeptidase F ( <i>B. subtilis</i> ) / Y (KT259045 <sup>2</sup> )                                | pMD18-T/native/+Proseq,<br>native                    | WB700                                         | n.d.                                                                                                  | Y/Y                                                       | [9]      |
| Synthesized cecropin A-melittin mutant (U) / n.d.                                                     | pDM030/Pg/v(maltose-<br>inducible)/SacB              | WB700                                         | 159 mg/L                                                                                              | Y/N                                                       | [10]     |
| $\alpha$ -Amylase ( <i>Bacillus amyloliquefaciens</i> ) /Y<br>(mentioned in text <sup>2</sup> )       | pP43X/P43/32aa (non-<br>specified)                   | WB800                                         | 5566 U/mg, 1.48x increased production in<br>WB800, when compared to wildtype                          | Y/I                                                       | [11]     |
| Lysozyme ( <i>Bacillus licheniformis</i> ) / Y (mentioned<br>in text)                                 | pGJ203/P43 fused to<br><i>PsacB</i> /SacB            | WB800                                         | 78 U/ml                                                                                               | Y/?                                                       | [12] *** |
| Protease ( <i>Halobacillus</i> sp) / n.d.                                                             | pSaltExSePR5/ <i>PopuAA</i><br>(NaCl induction)/SubE | WB800                                         | 9.1 U/ml                                                                                              | Y/I                                                       | [13]     |
| $\beta$ -1,3-1,4-glucanase (LicB) ( <i>C. thermocellum</i> ) / Y<br>(mentioned in text <sup>2</sup> ) | pP43JM2/P43/NprB                                     | WB800                                         | 1.18 U/g cell mass                                                                                    | Y/Y                                                       | [14]     |
| Nattokinase ( <i>B. subtilis</i> VTCC-DVN-12-01) / Y<br>(EF061457 <sup>2</sup> )                      | n.d./ <i>PacoA</i> /n.d.                             | WB800                                         | 600 mg/L                                                                                              | Y/N                                                       | [15]     |
| Cellobiose 2-epimerase from ( <i>Caldicellulosiruptor</i><br><i>saccharolyticus</i> ) / n.d.          | pMA09/n.d./n.d.                                      | WB800                                         | 5.3 U/mL                                                                                              | Y/Y                                                       | [16]     |
| PA (component of the anthrax toxin) ( <i>Bacillus</i><br><i>anthracis</i> ) / n.d.                    | pHT28 <i>pagA</i> / <i>Pgrac</i> /AmyL               | BRB07,<br>BRB08,<br>BRB11,<br>BRB12,<br>BRB14 | BRB07: Approximately 1 g/L, BRB08:<br>Slightly more than 1 g/L, BRB11-14: Slightly<br>less than 1 g/L | n.d./Y in BRB07-12,<br>hardly any<br>degradation in BRB14 | [17]     |
| 1,3-1,4- $\beta$ -glucanase(U) / n.d.                                                                 |                                                      | WB600                                         | 2493.8 U/mL                                                                                           | Y/n.d.                                                    | [18]     |

|                                                                                              |                                                        |                                     |                                                                                             |                                                   |      |
|----------------------------------------------------------------------------------------------|--------------------------------------------------------|-------------------------------------|---------------------------------------------------------------------------------------------|---------------------------------------------------|------|
| Paramyosin ( <i>Clororchis sinensis</i> ) / N (cyst wall)                                    | pEB03-CotC-<br>CsPmy/PcotC/spore located               | WB600                               | n.d.                                                                                        | Y/n.d.                                            | [19] |
| Pullulanase ( <i>Bacillus naganoensis</i> ) / N                                              | pMA0911/ Psac/LipA                                     | WB600,<br>WB800                     | Simultaneous DegQ production let to 60%<br>increased enzyme activity in WB800.<br>26.5 U/ml | Y/n.d.                                            | [20] |
| $\beta$ -Mannanase ( <i>Bacillus clausii</i> ) / Y<br>(WP_041823500.1 <sup>2</sup> )         | Pma5/P43/LipA                                          | WB600                               | 1050 U/ml                                                                                   | Y/n.d.                                            | [21] |
| Phospholipase D ( <i>Streptomyces racemochromogenes</i> ) / Y (AB573232 <sup>2</sup> )       | pMA0911/Hpall/AmyE<br>RBS optimized                    | WB600                               | 24.2 U/ml                                                                                   | Y/n.d.                                            | [22] |
| L-Asparaginase ( <i>Bacillus cereus</i> ) / N                                                | pP43NMK/P43/AmyE                                       | WB600                               | 374.9 U/ml                                                                                  | Y/n.d.                                            | [23] |
| GH30-8 endoxylanase ( <i>B. subtilis</i> ) / Y (mentioned in text <sup>2</sup> )             | pMA05/n.d./n.d.                                        | WB800                               | 55 U/mL                                                                                     | Y/N                                               | [24] |
| Cel8A endoglucanase fused to LysM cell wall binding module ( <i>C. thermocellum</i> ) / n.d. | pBL113/P IPTG inducible/<br>PhrC<br>Integration vector | WB800,<br>BRB07,<br>BRB08,<br>BRB14 | n.d. BRB08 highest production without<br>causing secretion stress                           | Y/Y                                               | [25] |
| Endo-inulinase ( <i>Pseudomonas mucidolens</i> ) / n.d.                                      | PHY300PLK/P43/NprB<br>Integration vector               | WB800-R                             | 67.84 $\pm$ 0.72 g/L                                                                        | Y/n.d.                                            | [26] |
| Nattokinase / Y (mentioned in text <sup>2</sup> )                                            | pBSG03/P08 (CodY binding<br>sequence deleted)/WapA     | WB800                               | 292 FU/ml                                                                                   | Y/N                                               | [27] |
| $\beta$ -galactosidase ( <i>Bacillus megaterium</i> ) / n.d.                                 | pMA05/n.d./n.d..                                       | WB800                               | 17.55 U/ml                                                                                  | Y/n.d.                                            | [28] |
| Chitinase ( <i>Bacillus</i> sp. DAU101) / Y (mentioned in text <sup>2</sup> )                | pP43NMK/P43/NprB also<br>RBS optimized                 | WB600                               | 51.67 U/mL                                                                                  | Y/reduced when<br>compared to previous<br>results | [29] |

|                                                                                                                   |                                             |                                       |                                                                                                       |        |      |
|-------------------------------------------------------------------------------------------------------------------|---------------------------------------------|---------------------------------------|-------------------------------------------------------------------------------------------------------|--------|------|
| Pullulanase ( <i>Bacillus naganoensis</i> ) / N                                                                   | Chromosomally                               | WB800                                 | 30.32 U/ml                                                                                            | Y/N    | [30] |
|                                                                                                                   | inserted/PHpall/LipA                        | WB600                                 | 18.83 U/ml                                                                                            | Y/Y    |      |
| Alkaline serine protease (BcaPRO, <i>Bacillus clausii</i> ) / Y (FJ940727.1 <sup>2</sup> )                        | pWPROn/PBSamy-PBaamy/DacB                   | WB600                                 | 27,860 U/ml                                                                                           | Y/n.d. | [31] |
| Cyclomaltodextrin glucanotransferase ( <i>Bacillus firmus</i> ) / Y (KF270899)                                    | pWB980/P43/SacB                             | WB800                                 | 1.33 $\mu$ mol $\beta$ -CD/min/mL                                                                     | Y/Y    | [32] |
| $\beta$ -mannanase ( <i>Bacillus</i> sp. MK-2) / Y (CAB12407.2 <sup>2</sup> )                                     | pP43NMK/P43/NprB                            | WB800                                 | 2802 U/mg                                                                                             | Y/n.d. | [33] |
| Nattokinase ( <i>B. subtilis</i> natto) / Y (mentioned in text <sup>2</sup> )                                     | pMA0911-wapA-pro-NK/PHpall-PHpall-PP43/WapA | WB800                                 | 816.7 $\pm$ 30.0 FU/mL                                                                                | Y/N    | [34] |
| CIPS/SCIN/IsaA/Nuc ( <i>Staphylococcus aureus</i> ) / Y (mentioned in text <sup>2</sup> )                         | pRAG3/PspaS/AmyQ                            | PG10 (mini <i>Bacillus</i> )          | Production in mini- <i>Bacillus</i> when this was not possible in the wt <i>Bacillus</i> strain (168) | Y/Y    | [35] |
| Diacylglycerol deacetylase R157T ( <i>Pyrococcus horikoshii</i> ) / N                                             | pMA0911/P43/ YncM                           | WB600                                 | 3,112.2 U/mg                                                                                          | Y/Y    | [36] |
| $\alpha$ -amylase (AmySA K82E/S405R, <i>Bacillus stearothermophilus</i> ) / Y (mentioned in text <sup>2</sup> )   | pBE/PaprE/YojL                              | WS11 ( $\Delta$ hrcA) <sup>****</sup> | 9201.1 U mL <sup>-1</sup>                                                                             | Y/n.d. | [37] |
| Recombinant keratinase, KerZ1 ( <i>Bacillus licheniformis</i> ) / Y (mentioned in text <sup>2</sup> )             | pP43NMK/p43/NprB                            | WB600                                 | 426.60 KU/mL                                                                                          | Y/N    | [38] |
| Polyethylene terephthalate hydrolase (PETase, <i>Ideonella sakaiensis</i> ) / Y (mentioned in text <sup>2</sup> ) | pUBC19/P43/Amy                              | WB600                                 | Increased 8 fold when compared to wt SP                                                               | Y/n.d. | [39] |
| Adenylate deaminase (AMPF, <i>Aspergillus oryzae</i> GX-08) / Y (mentioned in text <sup>2</sup> )                 | pMA5/PHpall/n.d..                           | WB600                                 | 2540 U/mL                                                                                             | Y/n.d. | [40] |
| Chlorothalonil hydrolytic dehalogenase (Chd, n.d.) / n.d.                                                         | Integrated in chromosome/PaprE              | WB800                                 | 2622 U/L                                                                                              | Y/n.d. | [41] |
| OUC-Lipase 6 ( <i>Streptomyces violascens</i> ) / N                                                               | pP43NMK/P43/NprB                            | WB800                                 | Increased activity 3.24 fold                                                                          | Y/n.d. | [42] |

|                                                                           |                                                         |                              |                                                          |        |      |
|---------------------------------------------------------------------------|---------------------------------------------------------|------------------------------|----------------------------------------------------------|--------|------|
| Lantibiotics ( <i>B. subtilis</i> ) / Y (mentioned in text <sup>2</sup> ) | Integration in chromosome/Pspank-hy/leader peptide SpaS | PG10 (mini <i>Bacillus</i> ) | n.d., clean background to simplify downstream processing | Y/n.d. | [43] |
|---------------------------------------------------------------------------|---------------------------------------------------------|------------------------------|----------------------------------------------------------|--------|------|

---

<sup>1</sup>Verified with SignalP4.1 if a Genbank accession was available

<sup>2</sup>Where appropriate the Genbank accession code or a reference to the main manuscript is indicated

\*Y, yes; N, no; n.d., not described; I, inconclusive

\*\*References cover the period between 2012 and 2020

\*\*\*Only the abstract is publicly available.

\*\*\*\*Mutation results in overexpression of chaperones GroEL-GroES and DnaK-DnaJ-GrpE

**Supplementary Table 2: Protein production and secretion in *L. lactis*, using various strains and expression systems**

| <b>Product / Naturally secreted via Sec (Y/N*)<sup>1,2</sup></b>                                                                     | <b>Producing vector/Promoter/SP<sup>1</sup></b>                                              | <b>Strain</b>                                                        | <b>Secreted yield</b>                                                                                                                                                  | <b>Biologically active/ recognized*</b> | <b>Ref**</b> |
|--------------------------------------------------------------------------------------------------------------------------------------|----------------------------------------------------------------------------------------------|----------------------------------------------------------------------|------------------------------------------------------------------------------------------------------------------------------------------------------------------------|-----------------------------------------|--------------|
| Virulence factors (SA0620, FtsL, ClfB, SA2100, Pro-Atl, IsdB) ( <i>Staphylococcus aureus</i> ) / Y (mentioned in text <sup>2</sup> ) | pNG4110/ <i>PnisA</i> /Usp45<br>pNG4111/ <i>PnisA</i> /Usp45<br>pNG4210/ <i>PnisA</i> /Usp45 | PA1001                                                               | mg/L range, post-translational phosphorylation obtained                                                                                                                | Y (partially done)/Y                    | [44]         |
| Virulence factors (HtrA1, HtrA2) ( <i>S. aureus</i> ) / Y (KF322112 and KF322111 <sup>2</sup> )                                      | pLB145/ <i>PZitR</i> /Exp4                                                                   | MG1363                                                               | 2.5 and 2.2 mg/L (HtrA1 and HtrA2 resp.)<br>Max 7 mg                                                                                                                   | Y/N                                     | [45]         |
| <i>S. aureus</i> virulence factors (LytM, Nuc, Aly, SA0620, SA2097) / Y (mentioned in text <sup>2</sup> )                            | pNG400/ <i>PnisA</i> /Usp45                                                                  | PA1001                                                               | 22; 18.8; 1.4; 4.2 mg/L (LytM, Nuc, SA2097, Aly resp.)                                                                                                                 | Y/Y                                     | [46]         |
| $\beta$ -Cyclodextrin Glucanotransferase / Y (mentioned in text <sup>2</sup> )                                                       | pNZ8048/ <i>PnisA</i> /native-SP (NSP), SPK1 or Usp45                                        | NZ9000                                                               | SPK1 secretion efficiency higher than Usp45. Total protein production higher for Usp45-fusion proteins                                                                 | Y/Y                                     | [47]         |
| Designed Ankyrin Repeat Proteins (DARPs) fused to LysM-domain / n.d.                                                                 | pNZ8148/ <i>PnisA</i> /Usp45                                                                 | NZ9000                                                               | n.d.                                                                                                                                                                   | Y/N                                     | [48]         |
| Murine IL-10, murine TGF- $\beta$ 1, human Elafin, murine SLP-1 / Y (mentioned in text <sup>2</sup> )                                | pSEC/ <i>PnisA</i> /Usp45                                                                    | NZ9000 (wt) and NZ9000 $\Delta$ <i>htrA</i> ( $\Delta$ <i>htrA</i> ) | IL-10: 40 ng/ml (wt)<br>TGF- $\beta$ 1: 50 ng/ml (wt)<br>Elafin: 37 ng/ml (wt) vs 55 ng/ml ( $\Delta$ <i>htrA</i> )<br>SLP-1: 100% secreted, yield not quantified (wt) | Y/I                                     | [49]         |
| Kisspeptin / Y (BC022819.1 <sup>2</sup> )                                                                                            | pNZ401/ <i>PnisA</i> /Usp45 + LEISSTCDA pro-peptide                                          | NZ9000                                                               | 27.9 $\mu$ g/ml                                                                                                                                                        | Y/I                                     | [50]         |
| <i>B. subtilis</i> originated Subtilisin QK-2 / Y (AJ579472.2 <sup>2</sup> )                                                         | pRF01 (pNZ8149 derivative)/ <i>PnisA</i> /Usp45                                              | NZ9000<br>NZ3900                                                     | Nd                                                                                                                                                                     | Y/I                                     | [51]         |

|                                                                                                                                                                                                            |                                                         |        |                                                                                                          |        |      |
|------------------------------------------------------------------------------------------------------------------------------------------------------------------------------------------------------------|---------------------------------------------------------|--------|----------------------------------------------------------------------------------------------------------|--------|------|
| Mouse heme oxygenase-1 / n.d.                                                                                                                                                                              | pNZ8148#2:SEC/ <i>PnisA</i> /Usp45                      | NZ9000 | Intracellular production, 5.37 ug/ml                                                                     | Y/N    | [52] |
| Pancreatitis-associated protein I (PAP) / n.d.                                                                                                                                                             | pSEC/ <i>PnisA</i> /Usp45                               | NZ9000 | n.d.                                                                                                     | Y/n.d. | [53] |
| Human interleukin 22 (IL-22) / Y (mentioned in text <sup>2</sup> )                                                                                                                                         | pSEC/ <i>PnisA</i> /Usp45                               | NZ9000 | 10 ng/ml                                                                                                 | Y/Y    | [54] |
| HSP65-6IA2P2 as autoantigens against T1 diabetes / n.d.                                                                                                                                                    | pCYT/ <i>PnisA</i> and pHI/P32/Usp45                    | NZ9000 | n.d.                                                                                                     | Y/n.d. | [55] |
| Carcinoembryonic antigen / n.d.                                                                                                                                                                            | pSEC:LEISS/ <i>PnisA</i> /Usp45 + LEISSTCDA pro-peptide | NZ9000 | Surface display on <i>L. lactis</i> cells using LcsB anchor                                              | Y/Y    | [56] |
| Infectious bronchitis virus (IBV) multi-epitope EpiC fused to protein A anchor <i>S. aureus</i> / n.d.                                                                                                     | pNZ8149/ <i>PnisA</i> /Usp45                            | NZ3900 | 27 mg/L                                                                                                  | Y/Y    | [57] |
| <i>Campylobacter jejuni</i> originated CjaA antigen presenting CjaD peptide epitopes fused to the C-terminus of the <i>L. lactis</i> YndF containing the LPTXG motif / Y (mentioned in text <sup>2</sup> ) | pUWM1000/ <i>Pusp45</i> /Usp45                          | IL1403 | n.d., however protein was detected on the surface of the <i>L. lactis</i> IL1403 producing cells         | Y/I    | [58] |
| Bacteriocin Pediocin PA-1 / Y (mentioned in text)                                                                                                                                                          | pSEC/ <i>PnisA</i> /Usp45 + LEISSTCDA or SD pro-peptide | NZ9000 | ~2-4 μmol pediocin PA-1 equivalents/g of dry weight bacteria.                                            | Y/n.d. | [59] |
| <i>Leuconostoc mesenteroides</i> originated glucansucrase (Dsrl) <sup>***</sup> / Y (mentioned in text <sup>2</sup> )                                                                                      | pMSP3535H3/ <i>PnisA</i> /Usp45,                        | LM0230 | 380 mg/L (at pH 6.0, in optimized fermentation set-up, high copy number plasmid (45–85 copies per cell)) | Y/I    | [60] |
| Thymic stromal lymphopoietin / n.d.                                                                                                                                                                        | pLB333/ <i>PgroESL</i> /Exp4                            | MG1363 | Maximum of 2500 pg/ml/OD bacteria, SICE system                                                           | Y/n.d. | [61] |
| Mature sakacin A (SakA) and its cognate immunity protein (SakI), two chimeras                                                                                                                              | pNZ8048/ <i>PnisA</i> /Usp45<br>pMG36c/P32/Usp45        | NZ9000 | 3.2 and 4.9 ug/mg dry weight bacteria producing EntP/SakA or SakA, resp.                                 | Y/N    | [62] |

mimicking the N-terminal end of mature enterocin P (EntP/SakA) and mature enterocin A (EntA/SakA) together with SakI / mentioned in text; SakA contains 18 aa leader peptide, SakI not secreted

|                                                                                                                                    |                                          |        |                 |        |      |
|------------------------------------------------------------------------------------------------------------------------------------|------------------------------------------|--------|-----------------|--------|------|
| Panel of 31 recombinant proteins ( <i>Plasmodium falciparum</i> ) / mentioned in text; diverse sub-cellular locations <sup>2</sup> | pSS1/n.d./n.d                            | MG1363 | n.d.            | Y/N    | [63] |
| Phytase ( <i>Escherichia coli</i> ) / n.d.                                                                                         | pFUM003/PlacA/Usp45                      | NZ9000 | 19 U/ml         | Y/N    | [64] |
| E6 oncoprotein (Human papillomavirus) / n.d.                                                                                       | pNZ8123/PnisA/Usp45                      | NZ9000 | n.d.            | Y/N    | [65] |
| Tumor necrosis factor-related apoptosis-inducing ligand (synthetic human) / N (transmembrane)                                      | pNZ8124/PnisA/Usp45                      | NZ9000 | 97.4 ng/ml      | Y/Y    | [66] |
| Plantaricin E ( <i>Lactobacillus plantarum</i> ) / Y (mentioned in text)                                                           | pNZ8148/PnisA/PlnA                       | NZ3900 | n.d.            | Y/n.d. | [67] |
| Apical membrane antigen 1 ( <i>Eimeria tenella</i> ) / N (transmembrane)                                                           | pTX8048/PnisA/Usp45                      | NZ9000 | n.d.            | Y/Y    | [68] |
| Nuclease ( <i>S. aureus</i> ) / Y (mentioned in text)                                                                              | pS (integrative)/P170/Usp45              | NZ9000 | n.d.            | Y/N    | [69] |
| Microbial transglutaminase ( <i>Streptomyces mobaraensis</i> ) / Y (DQ132977)                                                      | pNZ8048/Pp5 or PnisA/Usp45 or Usp45(K2A) | NZ9000 | 43.5 ± 0.4 mg/L | Y/N    | [70] |
| MPB70 ( <i>Mycobacterium bovis</i> ) / Y (mentioned in text <sup>2</sup> )                                                         | pNZ8048e/PnisA/Usp45TM8                  | NZ9000 | n.d.            | Y/n.d. | [71] |
| VP1 (enterovirus 71) / n.d. (located on virion surface)                                                                            | pMG36e/P32/Usp45                         | MG1363 | n.d.            | Y/n.d. | [72] |



|                                                                                                                             |                     |        |                  |        |      |
|-----------------------------------------------------------------------------------------------------------------------------|---------------------|--------|------------------|--------|------|
| $\beta$ -1,3-1,4-glucanase ( <i>Bacillus</i> sp. SJ-10) / n.d.                                                              | pNG8149/PnisA/Usp45 | NZ3900 | n.d.             | Y/N    | [73] |
| cyclodextrin glucanotransferase/ Y (mentioned in text <sup>2</sup> )                                                        | pNG8048/PnisA/G1    | NZ9000 | 16.89 U/ml       | Y/n.d. | [74] |
| Tumour necrosis factor-related apoptosis-inducing ligand (Human) / N (transmembrane protein)                                | pNG7021/PpepN/Usp45 | MG1363 | n.d.             | Y/Y    | [75] |
| E7 oncoprotein (optiE7; human papillomavirus type 16) / Y (mentioned in text <sup>2</sup> )                                 | pNZ8123/PnisA/Usp45 | NZ9000 | 35.49 $\mu$ g/mL | Y/N    | [76] |
| IMP1 ( <i>Eimeria tenella</i> ) / N (membrane protein)                                                                      | pTX8048/PnisA/Usp45 | NZ9000 | n.d.             | Y/n.d. | [77] |
| Circumsporozoite protein ( <i>Plasmodium falciparum</i> ) / Y (mentioned in text <sup>2</sup> ; sporozoite surface located) | pSS1/n.d./n.d.      | MG1363 | 25 mg/L          | Y/n.d. | [78] |

<sup>1</sup>Verified with SignalP4.1 if a Genbank accession was available

<sup>2</sup>Where appropriate the Genbank accession code or a reference to the main manuscript is indicated

\*Y, yes; N, no; n.d., not described; I, inconclusive

\*\*References cover the period between 2012 and 2020

\*\*\*First publication describing industrial application of *L. lactis* for secreted protein production

## REFERENCES

- [1] Feng, Y., Liu, S., Jiao, Y., Gao, H., Wang, M., Du, G. et al. (2017) Enhanced extracellular production of L-asparaginase from *Bacillus subtilis* 168 by *B. subtilis* WB600 through a combined strategy. *Appl.Microbiol.Biotechnol.* **101**: 1509-1520, <https://doi.org/10.1007/s00253-016-7816-x>
- [2] Song, W., Nie, Y., Mu, X.Q., Xu, Y. (2016) Enhancement of extracellular expression of *Bacillus naganensis pullulanase* from recombinant *Bacillus subtilis*: Effects of promoter and host. *Protein Expr.Purif.* **124**: 23-31, <https://doi.org/10.1016/j.pep.2016.04.008>
- [3] Ma, Y., Yang, H., Chen, X., Sun, B., Du, G., Zhou, Z., et al. (2015) Significantly improving the yield of recombinant proteins in *Bacillus subtilis* by a novel powerful mutagenesis tool (ARTP): Alkaline alpha-amylase as a case study. *Protein Expr.Purif.* **114**: 82-88, <https://doi.org/10.1016/j.pep.2015.06.016>
- [4] Guan, Z.B., Shui, Y., Song, C.M., Zhang, N., Cai, Y.J., Liao, X.R. (2015) Efficient secretory production of CotA-laccase and its application in the decolorization and detoxification of industrial textile wastewater. *Environ.Sci.Pollut.Res.Int.* **22**: 9515-9523, <https://doi.org/10.1007/s11356-015-4426-6>
- [5] Lin, B., Li, Z., Zhang, H., Wu, J., Luo, M. (2016) Cloning and Expression of the gamma-Polyglutamic Acid Synthetase Gene *pgsBCA* in *Bacillus subtilis* WB600. *Biomed.Res.Int.* **2016**: 3073949, <https://doi.org/10.1155/2016/3073949>
- [6] Liu, J.M., Xin, X.J., Li, C.X., Xu, J.H., Bao, J. (2012) Cloning of thermostable cellulase genes of *Clostridium thermocellum* and their secretive expression in *Bacillus subtilis*. *Appl.Biochem.Biotechnol.* **166**: 652-662, <https://doi.org/10.1007/s12010-011-9456-z>
- [7] Liu, B., Zhang, J., Li, B., Liao, X., Du, G., Chen, J. (2013) Expression and characterization of extreme alkaline, oxidation-resistant keratinase from *Bacillus licheniformis* in recombinant *Bacillus subtilis* WB600 expression system and its application in wool fiber processing. *World J.Microbiol.Biotechnol.* **29**: 825-832, <https://doi.org/10.1007/s11274-012-1237-5>
- [8] Phuong, N.D., Jeong, Y.S., Selvaraj, T., Kim, S.K., Kim, Y.H., Jung, K.H., et al. (2012) Production of XynX, a large multimodular protein of *Thermoanaerobacterium* sp., by protease-deficient *Bacillus subtilis* strains [corrected]. *Appl.Biochem.Biotechnol.* **168**: 375-382, <https://doi.org/10.1007/s12010-012-9781-x>
- [9] Meng, D., Dai, M., Xu, B.L., Zhao, Z.S., Liang, X., Wang, M., et al. (2015) Maturation of Fibrinolytic Bacillopeptidase F Involves both Hetero- and Autocatalytic Processes. *Appl.Environ.Microbiol.* **82**: 318-327, <https://doi.org/10.1128/AEM.02673-15>.
- [10] Ji, S., Li, W., Baloch, A.R., Wang, M., Li, H., Cao, B., et al. (2017) Efficient biosynthesis of a Cecropin A-melittin mutant in *Bacillus subtilis* WB700. *Sci.Rep.* **7**: 40587, <https://doi.org/10.1038/srep40587>
- [11] Chen, J., Chen, X., Dai, J., Xie, G., Yan, L., et al. (2015) Cloning, enhanced expression and characterization of an alpha-amylase gene from a wild strain in *B. subtilis* WB800. *Int.J.Biol.Macromol.* **80**: 200-207, <https://doi.org/10.1016/j.ijbiomac.2015.06.018>

- [12] Zhang, H., Fu, G., Zhang, D. (2014) Cloning, characterization, and production of a novel lysozyme by different expression hosts. *J.Microbiol.Biotechnol.* **24**: 1405-1412, <https://doi.org/10.4014/jmb.1404.04039>.
- [13] Promchai, R., Promdonkoy, B., Tanapongpipat, S., Visessanguan, W., Eurwilaichitr, L., Luxananil, P. (2016) A novel salt-inducible vector for efficient expression and secretion of heterologous proteins in *Bacillus subtilis*. *J.Biotechnol.* **222**: 86-93, <https://doi.org/10.1016/j.jbiotec.2016.02.019>
- [14] Luo, Z., Gao, Q., Li, X., Bao, J. (2014) Cloning of LicB from *Clostridium thermocellum* and its efficient secretive expression of thermostable beta-1,3-1,4-glucanase. *Appl.Biochem.Biotechnol.* **173**: 562-570, <https://doi.org/10.1007/s12010-014-0863-9>
- [15] Nguyen, T.T., Quyen, T.D., Le, H.T. (2013) Cloning and enhancing production of a detergent- and organic-solvent-resistant nattokinase from *Bacillus subtilis* VTCC-DVN-12-01 by using an eight-protease-gene-deficient *Bacillus subtilis* WB800. *Microb.Cell.Fact.* **12**: 79-2859, <https://doi.org/10.1186/1475-2859-12-79>
- [16] Wu, L., Xu, C., Li, S., Liang, J., Xu, H., Xu, Z. (2017) Efficient production of lactulose from whey powder by cellobiose 2-epimerase in an enzymatic membrane reactor. *Bioresour.Technol.* **233**: 305-312, <https://doi.org/10.1016/j.biortech.2017.02.089>
- [17] Pohl, S., Bhavsar, G., Hulme, J., Bloor, A.E., Misirli, G., Leckenby, M.W., et al. (2013) Proteomic analysis of *Bacillus subtilis* strains engineered for improved production of heterologous proteins. *Proteomics* **13**: 3298-3308, <https://doi.org/10.1002/pmic.201300183>
- [18] Niu, C., Liu, C., Li, Y., Zheng, F., Wang, J., Li, Q. (2018) Production of a thermostable 1,3-1,4-beta-glucanase mutant in *Bacillus subtilis* WB600 at a high fermentation capacity and its potential application in the brewing industry. *Int.J.Biol.Macromol.* **107**: 28-34, <https://doi.org/10.1016/j.ijbiomac.2017.08.139>.
- [19] Sun, H., Lin, Z., Zhao, L., Chen, T., Shang, M., Jiang, H. et al. (2018) *Bacillus subtilis* spore with surface display of paramyosin from *Clonorchis sinensis* potentializes a promising oral vaccine candidate. *Parasit.Vectors* 2018, **11**: 156-018, <https://doi.org/10.1186/s13071-018-2757-0>.
- [20] Deng, Y., Nie, Y., Zhang, Y., Wang, Y., Xu, Y. (2018) Improved inducible expression of *Bacillus naganoensis* pullulanase from recombinant *Bacillus subtilis* by enhancer regulation. *Protein Expr.Purif.* **148**: 9-15, <https://doi.org/10.1016/j.pep.2018.03.012>
- [21] Zhou, C., Xue, Y., Ma, Y. (2018) Characterization and high-efficiency secreted expression in *Bacillus subtilis* of a thermo-alkaline beta-mannanase from an alkaliphilic *Bacillus clausii* strain S10. *Microb.Cell.Fact.* **17**: 124-018, <https://doi.org/10.1186/s12934-018-0973-0>
- [22] Huang, T., Lv, X., Li, J., Shin, H.D., Du, G., Liu, L. (2018) Combinatorial Fine-Tuning of Phospholipase D Expression by *Bacillus subtilis* WB600 for the Production of Phosphatidylserine. *J.Microbiol.Biotechnol.* **28**: 2046-2056, <https://doi.org/10.4014/jmb.1806.06048>
- [23] Feng, Y., Liu, S., Jiao, Y., Wang, Y., Wang, M., Du, G. (2019) Gene cloning and expression of the l-asparaginase from *Bacillus cereus* BDRD-ST26 in *Bacillus subtilis* WB600. *J.Biosci.Bioeng.* **127**: 418-424, <https://doi.org/10.1016/j.jbiosc.2018.09.007>

- [24] Guo, Y., Gao, Z., Xu, J., Chang, S., Wu, B., He, B. (2018) A family 30 glucurono-xylanase from *Bacillus subtilis* LC9: Expression, characterization and its application in Chinese bread making. *Int.J.Biol.Macromol.* **117**: 377-384, <https://doi.org/10.1016/j.ijbiomac.2018.05.143>
- [25] Huang, G.L., Gosschalk, J.E., Kim, Y.S., Ogorzalek Loo, R.R., Clubb, R.T. (2018) Stabilizing displayed proteins on vegetative *Bacillus subtilis* cells. *Appl.Microbiol.Biotechnol.* **102**: 6547-6565, <https://doi.org/10.1007/s00253-018-9062-x>
- [26] Jiang, R., Qiu, Y., Huang, W., Zhang, L., Xue, F., Ni, H., et al. (2018) One-Step Bioprocess of Inulin to Product Inulo-Oligosaccharides Using *Bacillus subtilis* Secreting an Extracellular Endo-Inulinase. *Appl.Biochem.Biotechnol.* **187**:116-128, <https://doi.org/10.1007/s12010-018-2806-3>
- [27] Cui, W., Suo, F., Cheng, J., Han, L., Hao, W., Guo, J., et al. (2018) Stepwise modifications of genetic parts reinforce the secretory production of nattokinase in *Bacillus subtilis*. *Microb.Biotechnol.* **11**: 930-942, <https://doi.org/10.1111/1751-7915.13298>
- [28] Zhao, L., Zhou, Y., Qin, S., Qin, P., Chu, J., He, B. (2018) beta-Galactosidase BMG without galactose and glucose inhibition: Secretory expression in *Bacillus subtilis* and for synthesis of oligosaccharide. *Int.J.Biol.Macromol.* **120**: 274-278, <https://doi.org/10.1016/j.ijbiomac.2018.07.148>
- [29] Pan, M., Li, J., Lv, X., Du, G., Liu, L. (2019) Molecular engineering of chitinase from *Bacillus* sp. DAU101 for enzymatic production of chitooligosaccharides. *Enzyme Microb. Technol.* **124**: 54-62, <https://doi.org/10.1016/j.enzmictec.2019.01.012>
- [30] Wang, Y., Chen, S., Zhao, X., Zhang, Y., Wang, X., Nie, Y., et al. (2019) Enhancement of the production of *Bacillus naganoensis* pullulanase in recombinant *Bacillus subtilis* by integrative expression. *Protein Expr.Purif.* **159**: 42-48, <https://doi.org/10.1016/j.pep.2019.03.006>
- [31] Liu, Y., Shi, C., Li, D., Chen, X., Li, J., Zhang, Y., et al. (2019) Engineering a highly efficient expression system to produce BcaPRO protease in *Bacillus subtilis* by an optimized promoter and signal peptide. *Int.J.Biol.Macromol.* **138**: 903-911, <https://doi.org/10.1016/j.ijbiomac.2019.07.175>
- [32] Gimenez, G.G., Costa, H., de Lima Neto, Q.A., Fernandez, M.A., Ferrarotti, S.A., Matioli, G. (2019) Sequencing, cloning, and heterologous expression of cyclomaltodextrin glucanotransferase of *Bacillus firmus* strain 37 in *Bacillus subtilis* WB800. *Bioprocess Biosyst Eng.* **42**: 621-629, <https://doi.org/10.1007/s00449-018-02068-4>
- [33] Zhang, W., Liu, Z., Zhou, S., Mou, H., Zhang, R. (2019) Cloning and expression of a beta-mannanase gene from *Bacillus* sp. MK-2 and its directed evolution by random mutagenesis. *Enzyme Microb. Technol.* **124**: 70-78, <https://doi.org/10.1016/j.enzmictec.2019.02.003>
- [34] Liu, Z., Zheng, W., Ge, C., Cui, W., Zhou, L., Zhou, Z. (2019) High-level extracellular production of recombinant nattokinase in *Bacillus subtilis* WB800 by multiple tandem promoters. *BMC Microbiol.* **19**: 89-019, <https://doi.org/10.1186/s12866-019-1461-3>
- [35] Aguilar Suarez, R., Stulke, J., van Dijk, J.M. (2019) Less is more: towards a genome-reduced *Bacillus* cell factory for 'difficult proteins'. *ACS Synth.Biol.* **8**: 99-108, <https://doi.org/10.1021/acssynbio.8b00342>

- [36] Jiang, Z., Niu, T., Lv, X., Liu, Y., Li, J., Lu, W., et al. (2019) Secretary Expression Fine-Tuning and Directed Evolution of Diacetylchitobiose Deacetylase by *Bacillus subtilis*. *Appl. Environ. Microbiol.* 2019, **85**: e01076-19, <https://doi.org/10.1128/AEM.01076-19>
- [37] Yao, D., Su, L., Li, N., Wu, J. (2019) Enhanced extracellular expression of *Bacillus stearothermophilus* alpha-amylase in *Bacillus subtilis* through signal peptide optimization, chaperone overexpression and alpha-amylase mutant selection. *Microb. Cell. Fact.* **18**: 69-019, <https://doi.org/10.1186/s12934-019-1119-8>
- [38] Peng, Z., Mao, X., Zhang, J., Du, G., Chen, J. (2020) Biotransformation of keratin waste to amino acids and active peptides based on cell-free catalysis. *Biotechnol. Biofuels* **13**: 61-020, <https://doi.org/10.1186/s13068-020-01700-4>
- [39] Wang, N., Guan, F., Lv, X., Han, D., Zhang, Y., Wu, N., et al. (2020) Enhancing secretion of polyethylene terephthalate hydrolase PETase in *Bacillus subtilis* WB600 mediated by the SPamy signal peptide. *Lett. Appl. Microbiol.* **71**: 235-241, <https://doi.org/10.1007/s00449-020-02288-7>
- [40] Ke, C., Li, S., Cui, Y., Qiu, H., Pang, Z. (2020) Effects of different expression systems on characterization of adenylate deaminase from *Aspergillus oryzae*. *Bioprocess Biosyst Eng.* **43**: 919-926, <https://doi.org/10.1007/s00449-020-02288-7>.
- [41] Ye, B., Luo, Y., Zhong, B., Zhu, J., Huang, J., Gu, J., et al. (2020) High-level stable expression of gene for preparation of chlorothalonil hydrolytic dehalogenase and its application in elimination of chlorothalonil inhibition on bioconversion of lignocellulosic biomass. *J. Biosci. Bioeng.* **130**: 630-636, <https://doi.org/10.1016/j.jbiosc.2020.08.003>
- [42] Gao, K., Chu, W., Sun, J., Mao, X. (2020) Identification of an alkaline lipase capable of better enrichment of EPA than DHA due to fatty acids selectivity and regioselectivity. *Food Chem.* **330**: 127225, <https://doi.org/10.1016/j.foodchem.2020.127225>
- [43] van Tilburg, A.Y., van Heel, A.J., Stulke, J., de Kok, N.A.W., Rueff, A.S., Kuipers, O.P. (2020) Mini*Bacillus* PG10 as a Convenient and Effective Production Host for Lantibiotics. *ACS Synth. Biol.* **9**: 1833-1842, <https://doi.org/10.1021/acssynbio.0c00194>
- [44] Neef, J., Milder, F.J., Koedijk, D.G., Klaassens, M., Heezius, E.C., van Strijp, J.A., et al. (2015) Versatile vector suite for the extracytoplasmic production and purification of heterologous His-tagged proteins in *Lactococcus lactis*. *Appl. Microbiol. Biotechnol.* **99**: 9037-48, <https://doi.org/10.1007/s00253-015-6778-8>
- [45] Samazan, F., Rokbi, B., Seguin, D., Telles, F., Gautier, V., Richarme, G., et al. (2015) Production, secretion and purification of a correctly folded staphylococcal antigen in *Lactococcus lactis*. *Microb. Cell. Fact.* **14**: 104-015, <https://doi.org/10.1186/s12934-015-0271-z>
- [46] Neef, J., Koedijk, D.G., Bosma, T., van Dijk, J.M., Buist, G. (2014) Efficient production of secreted staphylococcal antigens in a non-lysing and proteolytically reduced *Lactococcus lactis* strain. *Appl. Microbiol. Biotechnol.* **98**: 10131-41, <https://doi.org/10.1007/s00253-014-6030-y>
- [47] Subramaniam, M., Baradaran, A., Rosli, M.I., Rosfarizan, M., Khatijah, Y., Raha, A.R. (2012) Effect of signal peptides on the secretion of beta-cyclodextrin glucanotransferase in *Lactococcus lactis* NZ9000. *J. Mol. Microbiol. Biotechnol.* **22**: 361-372, <https://doi.org/10.1159/000343921>

- [48] Zadavec, P., Strukelj, B., Berlec, A. (2015) Improvement of LysM-mediated surface display of designed ankyrin repeat proteins (DARPs) in recombinant and nonrecombinant strains of *Lactococcus lactis* and *Lactobacillus* Species. *Appl. Environ. Microbiol.* **81**: 2098-2106, <https://doi.org/10.1128/AEM.03694-14>
- [49] Bermudez-Humaran, L.G., Motta, J.P., Aubry, C., Kharrat, P., Rous-Martin, L., Sallenave J.M., et al. (2015) Serine protease inhibitors protect better than IL-10 and TGF-beta anti-inflammatory cytokines against mouse colitis when delivered by recombinant lactococci. *Microb. Cell. Fact.* **14**: 26-015, <https://doi.org/10.1186/s12934-015-0198-4>
- [50] Zhang, B., Li, A., Zuo, F., Yu, R., Zeng, Z., Ma, H., et al. (2016) Recombinant *Lactococcus lactis* NZ9000 secretes a bioactive kisspeptin that inhibits proliferation and migration of human colon carcinoma HT-29 cells. *Microb. Cell. Fact.* **15**: 102-016, <https://doi.org/10.1186/s12934-016-0506-7>
- [51] Mao, R., Zhou, K., Han, Z., Wang, Y. (2016) Subtilisin QK-2: secretory expression in *Lactococcus lactis* and surface display onto gram-positive enhancer matrix (GEM) particles. *Microb. Cell. Fact.* **15**: 80-016, <https://doi.org/10.1186/s12934-016-0478-7>
- [52] Shigemori, S., Watanabe, T., Kudoh, K., Ihara, M., Nigar, S., Yamamoto, Y., et al. (2015) Oral delivery of *Lactococcus lactis* that secretes bioactive heme oxygenase-1 alleviates development of acute colitis in mice. *Microb. Cell. Fact.* **14**: 189-015, <https://doi.org/10.1186/s12934-015-0378-2>
- [53] Carvalho, R.D., Breyner, N., Menezes-Garcia, Z., Rodrigues, N.M., Lemos, L., Maioli, T.U., et al. (2017) Secretion of biologically active pancreatitis-associated protein I (PAP) by genetically modified dairy *Lactococcus lactis* NZ9000 in the prevention of intestinal mucositis. *Microb. Cell. Fact.* **16**: 27-017, <https://doi.org/10.1186/s12934-017-0624-x>
- [54] Loera-Arias, M.J., Villatoro-Hernandez, J., Parga-Castillo, M.A., Salcido-Montenegro, A., Barboza-Quintana, O., Munoz-Maldonado, G.E., et al. (2014) Secretion of biologically active human interleukin 22 (IL-22) by *Lactococcus lactis*. *Biotechnol. Lett.* **36**: 2489-2494, <https://doi.org/10.1007/s10529-014-1626-y>
- [55] Liu, K.F., Liu, X.R., Li, G.L., Lu, S.P., Jin, L., Wu, J. (2016) Oral administration of *Lactococcus lactis*-expressing heat shock protein 65 and tandemly repeated IA2P2 prevents type 1 diabetes in NOD mice. *Immunol. Lett.* **174**: 28-36, <https://doi.org/10.1016/j.imlet.2016.04.008>
- [56] Zhang, X., Hu, S., Du, X., Li, T., Han, L., Kong, J. (2016) Heterologous expression of carcinoembryonic antigen in *Lactococcus lactis* via LcsB-mediated surface displaying system for oral vaccine development. *J. Microbiol. Immunol. Infect.* **49**: 851-858.
- [57] Cao, H.P., Wang, H.N., Yang, X., Zhang, A.Y., Li, X., Ding, M.D., et al. (2013) *Lactococcus lactis* anchoring avian infectious bronchitis virus multi-epitope peptide EpiC induced specific immune responses in chickens. *Biosci. Biotechnol. Biochem.* **77**: 1499-1504, <https://doi.org/10.1271/bbb.130157>
- [58] Kobierecka, P.A., Olech, B., Ksiazek, M., Derlatka, K., Adamska, I., Majewski, P.M., et al. (2016) Cell Wall Anchoring of the Campylobacter Antigens to *Lactococcus lactis*. *Front. Microbiol.* **7**: 165, <https://doi.org/10.3389/fmicb.2016.00165>

- [59] Back, A., Borges, F., Mangavel, C., Paris, C., Rondags, E., Kapel, R., et al. (2016) Recombinant pediocin in *Lactococcus lactis*: increased production by propeptide fusion and improved potency by co-production with PedC. *Microb.Biotechnol.* **9**: 466-477, <https://doi.org/10.1111/1751-7915.12285>
- [60] Skory, C.D., Cote, G.L. (2015) Secreted expression of *Leuconostoc mesenteroides* glucansucrase in *Lactococcus lactis* for the production of insoluble glucans. *Appl.Microbiol.Biotechnol.* 2015, **99**: 10001-10010, <https://doi.org/10.1007/s00253-015-6854-0>
- [61] Aubry, C., Michon, C., Chain, F., Chvatchenko, Y., Goffin, L., Zimmerli, S.C., et al. (2015) Protective effect of TSLP delivered at the gut mucosa level by recombinant lactic acid bacteria in DSS-induced colitis mouse model. *Microb.Cell.Fact.* **14**: 176-015, <https://doi.org/10.1186/s12934-015-0367-5>
- [62] Jimenez, J.J., Borrero, J., Diep, D.B., Gutiez, L., Nes, I.F., Herranz, C., et al. (2013) Cloning, production, and functional expression of the bacteriocin sakacin A (SakA) and two SakA-derived chimeras in lactic acid bacteria (LAB) and the yeasts *Pichia pastoris* and *Kluyveromyces lactis*. *J.Ind.Microbiol.Biotechnol.* **40**: 977-993, <https://doi.org/10.1007/s10295-013-1302-6>
- [63] Singh, S.K., Tiendrebeogo, R.W., Chourasia, B.K., Kana, I.H., Singh, S., Theisen, M. (2018) *Lactococcus lactis* provides an efficient platform for production of disulfide-rich recombinant proteins from *Plasmodium falciparum*. *Microb.Cell.Fact.* **17**: 55-018, <https://doi.org/10.1186/s12934-018-0902-2>
- [64] Pakbaten, B., Majidzadeh Heravi, R., Kermanshahi, H., Sekhavati, M.H., Javadmanesh, A., Mohammadi Ziarat, M., et al. (2019) Production of Phytase Enzyme by a Bioengineered Probiotic for Degrading of Phytate Phosphorus in the Digestive Tract of Poultry. *Probiotics Antimicrob.Proteins* **11**: 580-587, <https://doi.org/10.1007/s12602-018-9423-x>
- [65] Taghinezhad, S.S., Mohseni, A.H., Keyvani, H., Razavilar, V. (2018) Protection against human papillomavirus type 16-induced tumors in C57BL/6 mice by mucosal vaccination with *Lactococcus lactis* NZ9000 expressing E6 oncoprotein. *Microb.Pathog.* **126**: 149-156, <https://doi.org/10.1016/j.micpath.2018.10.043>
- [66] Ciacma, K., Wieckiewicz, J., Kedracka-Krok, S., Kurtyka, M., Stec, M., Siedlar, M., et al. (2018) Secretion of tumoricidal human tumor necrosis factor-related apoptosis-inducing ligand (TRAIL) by recombinant *Lactococcus lactis*: optimization of in vitro synthesis conditions. *Microb.Cell.Fact.* **17**: 177-018, <https://doi.org/10.1186/s12934-018-1028-2>
- [67] Mustopa, A.Z., Mariyah, S., Fatimah, Budiarti, S., Murtiyaningsih, H., Alfisyahrin, W.N. (2018) Construction, heterologous expression, partial purification, and in vitro cytotoxicity of the recombinant plantaricin E produced by *Lactococcus lactis* against Enteropathogenic *Escherichia coli* K.1.1 and human cervical carcinoma (HeLa) cells. *Mol.Biol.Rep.* **45**: 1235-1244, <https://doi.org/10.1007/s11033-018-4277-6>
- [68] Li, J., Wang, F., Ma, C., Huang, Y., Wang, D., Ma, D. (2018) Recombinant *Lactococcus lactis* expressing *Eimeria tenella* AMA1 protein and its immunological effects against homologous challenge. *Exp.Parasitol.* **191**: 1-8, <https://doi.org/10.1016/j.exppara.2018.05.003>
- [69] Koko, I., Song, A.A., Masarudin, M.J., Abdul Rahim, R. (2019) Engineering integrative vectors based on phage site-specific recombination mechanism for *Lactococcus lactis*. *BMC Biotechnol.* **19**: 82-019, <https://doi.org/10.1186/s12896-019-0575-x>

- [70] Ma, T., Lu, J., Zhu, J., Li, X., Gu, H., Montalban-Lopez, M., et al. (2019) The Secretion of *Streptomyces monbaraensis* Transglutaminase From *Lactococcus lactis* and Immobilization on Porous Magnetic Nanoparticles. *Front.Microbiol.* **10**: 1675, <https://doi.org/10.3389/fmicb.2019.01675>
- [71] Stedman, A., Chambers, M.A., Gutierrez-Merino, J. (2019) Secretion and functional expression of Mycobacterium bovis antigens MPB70 and MPB83 in lactic acid bacteria. *Tuberculosis* **117**: 24-30, <https://doi.org/10.1016/j.tube.2019.05.007>
- [72] Xu, P., Wang, Y., Tao, L., Wu, X., Wu, W. (2019) Recombinant *Lactococcus lactis* secreting viral protein 1 of enterovirus 71 and its immunogenicity in mice. *Biotechnol.Lett.* 2019, **41**: 867-872, <https://doi.org/10.1007/s10529-019-02695-1>
- [73] Tak, J.Y., Jang, W.J., Lee, J.M., Suraiya, S., Kong, I.S. (2019) Expression in *Lactococcus lactis* of a beta-1,3-1,4-glucanase gene from *Bacillus* sp. SJ-10 isolated from fermented fish. *Protein Expr.Purif.* **162**: 18-23, <https://doi.org/10.1016/j.pep.2019.05.006>
- [74] Mahmud, H., Ismail, A., Abdul Rahim, R., Low, K.O., Md Illias, R. (2019) Enhanced secretion of cyclodextrin glucanotransferase (CGTase) by *Lactococcus lactis* using heterologous signal peptides and optimization of cultivation conditions. *J.Biotechnol.* 2019, **296**: 22-31, <https://doi.org/10.1016/j.jbiotec.2019.02.013>
- [75] Bohlul, E., Hasanlou, F., Taramchi, A.H., Nadri, S. (2019) TRAIL-expressing recombinant *Lactococcus lactis* induces apoptosis in human colon adenocarcinoma SW480 and HCT116 cells. *J.Appl.Microbiol.* **126**: 1558-1567, <https://doi.org/10.1111/jam.14237>
- [76] Mohseni, A.H., Taghinezhad-S, S., Keyvani, H., Razavilar, V. (2019) Extracellular overproduction of E7 oncoprotein of Iranian human papillomavirus type 16 by genetically engineered *Lactococcus lactis*. *BMC Biotechnol.* **19**: 8-019, <https://doi.org/10.1186/s12896-019-0499-5>
- [77] Ma, C., Li, G., Chen, W., Jia, Z., Yang, X., Pan, X., et al. (2021) *Eimeria tenella*: IMP1 protein delivered by *Lactococcus lactis* induces immune responses against homologous challenge in chickens. *Vet.Parasitol.* 2021, **289**: 109320, <https://doi.org/10.1016/j.vetpar.2020.109320>
- [78] Singh, S.K., Plieskatt, J., Chourasia, B.K., Singh, V., Bolscher, J.M., Dechering, K.J., et al. (2020) The *Plasmodium falciparum* circumsporozoite protein produced in *Lactococcus lactis* is pure and stable. *J.Biol.Chem.* **295**: 403-414, <https://doi.org/10.1074/jbc.RA119.011268>
